# Supplementary material
Source: publisher site journal article supplement (https://www.dovepress.com/article/254292)
Supplement: Supplementary file 1 [file get_supplementary_file.php]

**Supplementary Data**

**End processing factor APLF promotes NHEJ efficiency and contributes to TMZ- and ionizing radiation-resistance in glioblastoma cells**

Wei Dong, Lanlan Li, Xuepeng Teng, Xinhua Yang, Shujing Si, Jie Chai


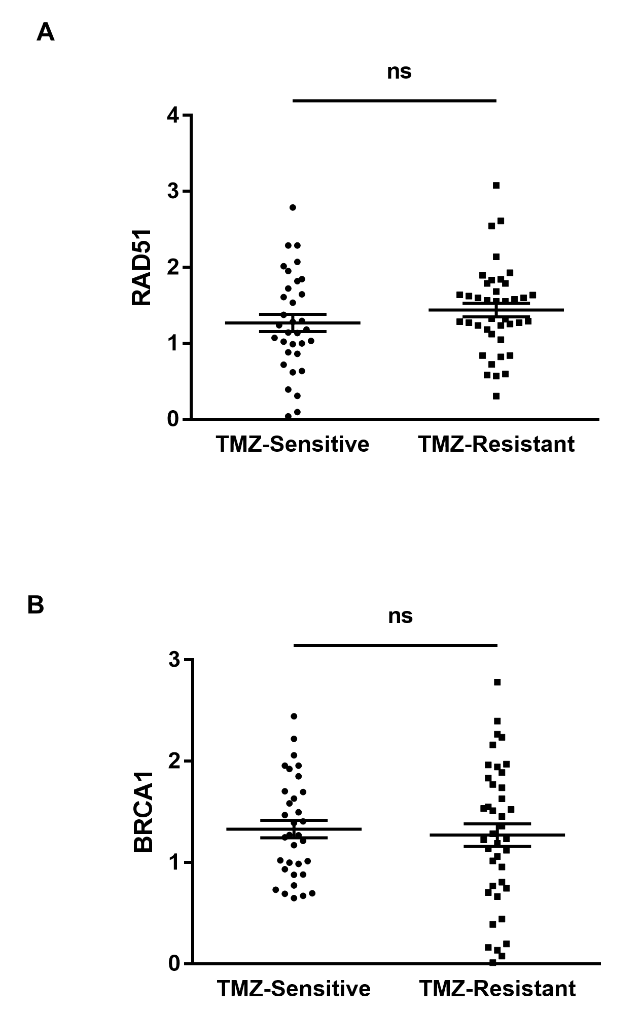


**Supplementary Figure 1. Expression of HR key factors was irrelevant to TMZ resistance**

**(A)** RAD51 mRNA expression in GBM patient samples. TMZ sensitive group: n=30. TMZ resistant group: n=40. ns: not significant. **(B)** BRCA1 mRNA expression in GBM patient samples. TMZ sensitive group: n=30. TMZ resistant group: n=40. ns: not significant.


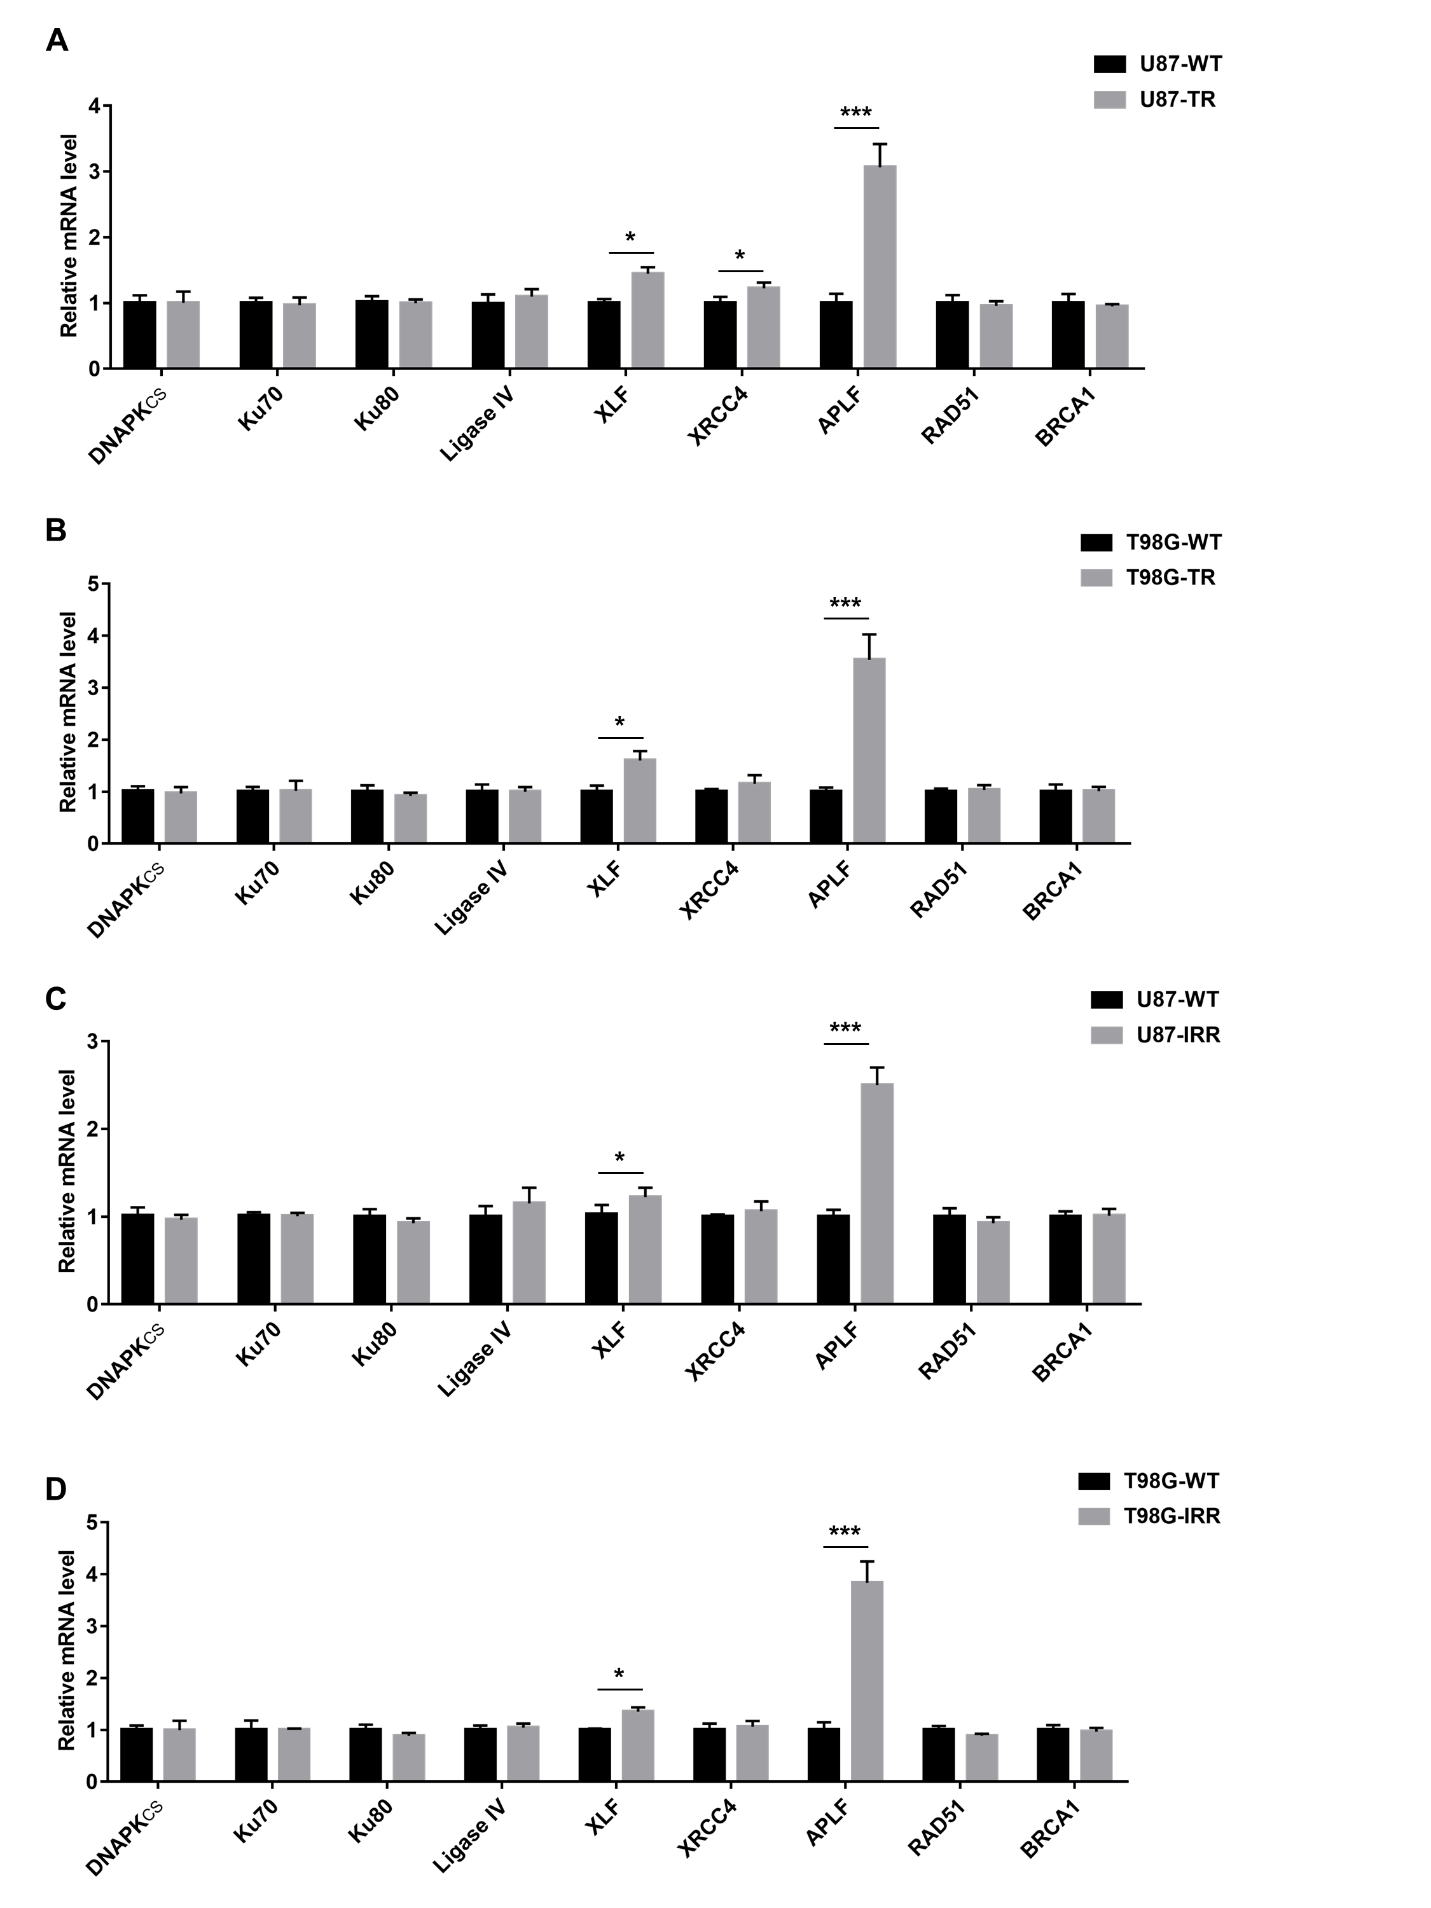


**Supplementary Figure 2. Expression of NHEJ and HR key factors in TMZ- and IR-resistant GBM cells**

**(A)** mRNA expression of NHEJ key factors (DNAPKcs, Ku70, Ku80, Ligase IV, XLF, XRCC4 and APLF) and HR key factors (RAD51 and BRCA1) in U87-WT and U87-TR cells. **(B)** mRNA expression of NHEJ key factors and HR key factors in T98G-WT and T98G-TR cells. **(C)** mRNA expression of NHEJ key factors and HR key factors in U87-WT and U87-IRR cells. **(D)** mRNA expression of NHEJ key factors and HR key factors in T98G-WT and T98G-IRRcells. *: p<0.05, ***: p<0.001.


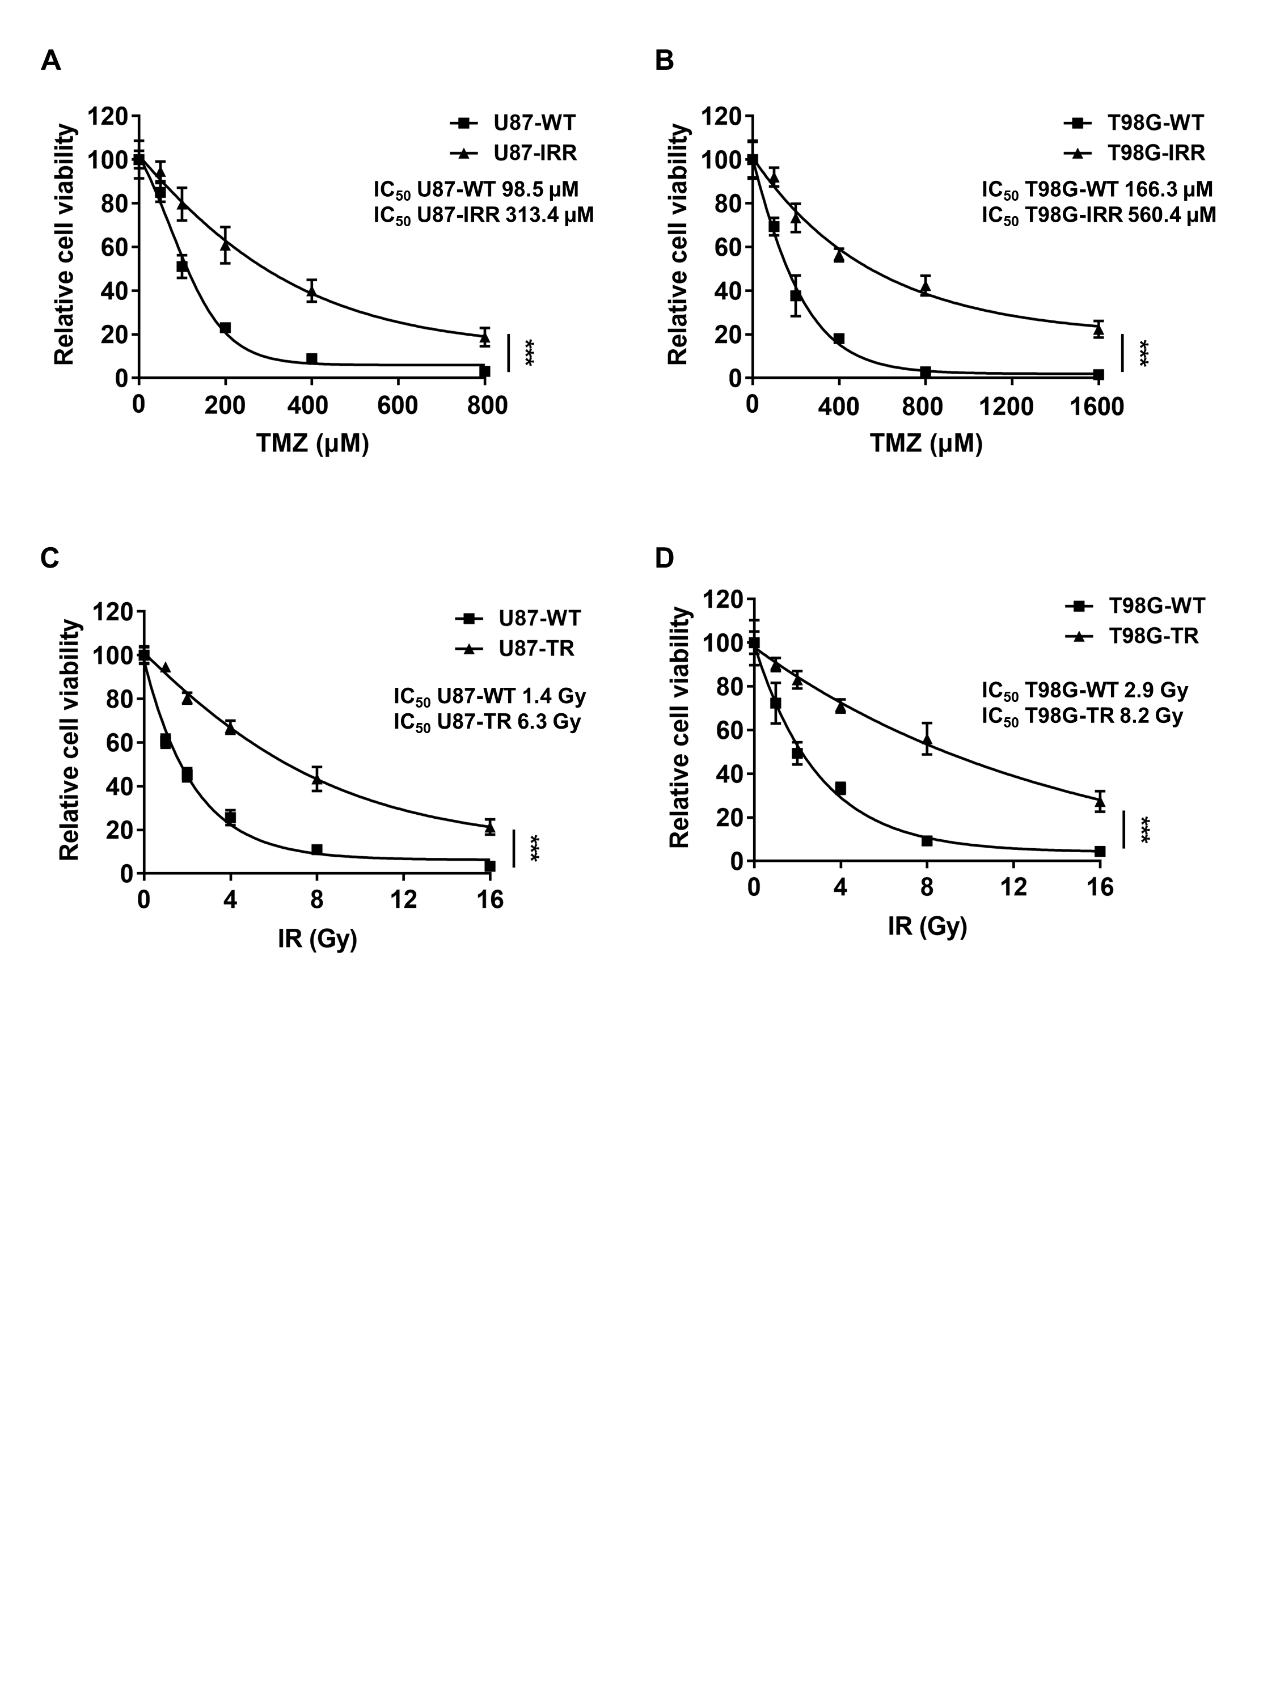


**Supplementary Figure 3. TMZ-resistant cells were resistant to IR, and IR-resistant cells were resistant to TMZ.**

**(A)** Cell viability of U87-WT, U87-IRR, **(B)** T98G-WT and T98G-IRR cells to TMZ. Data are represented as mean ± SD of three independent experiments. ***: p < 0.001. **(C)** Cell viability of U87-WT, U87-TR **(D)** T98G-WT and T98G-TR cells to IR. Data are represented as mean ± SD of three independent experiments. ***: p < 0.001.


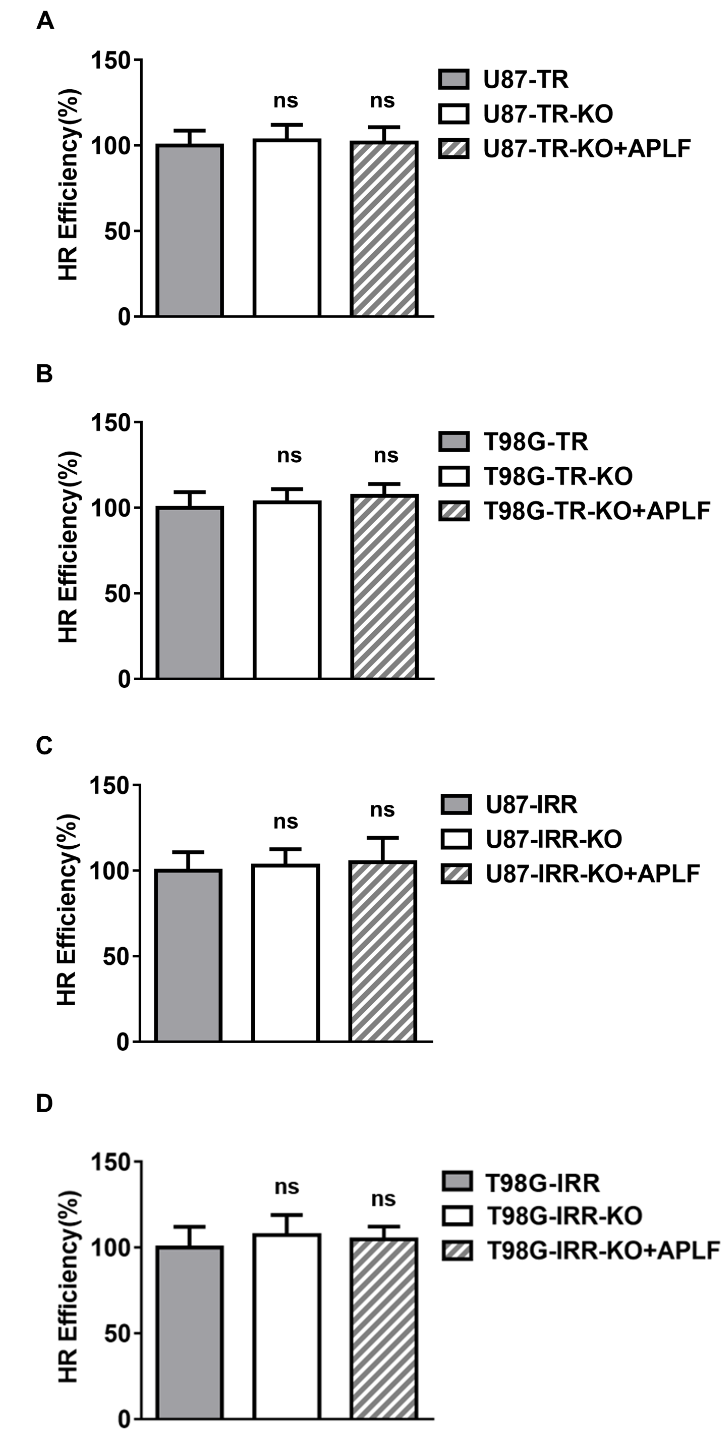


**Supplementary Figure 4. APLF did not affect HR efficiency in TMZ- and IR-resistant GBM cells**

**(A)** Quantification of GFP cells result from successful HR events in U87-TR, U87-TR-KO, U87-TR-KO+APLF, **(B)** T98G-TR, T98G-TR-KO, T98G-TR-KO+APLF, **(C)** U87-IRR, U87-IRR-KO, U87-IRR-KO+APLF **(D)** T98G-IRR, T98G-IRR-KO and T98G-IRR-KO+APLF cell lines. Each result represents 3 independent experiments. ns: not significant.


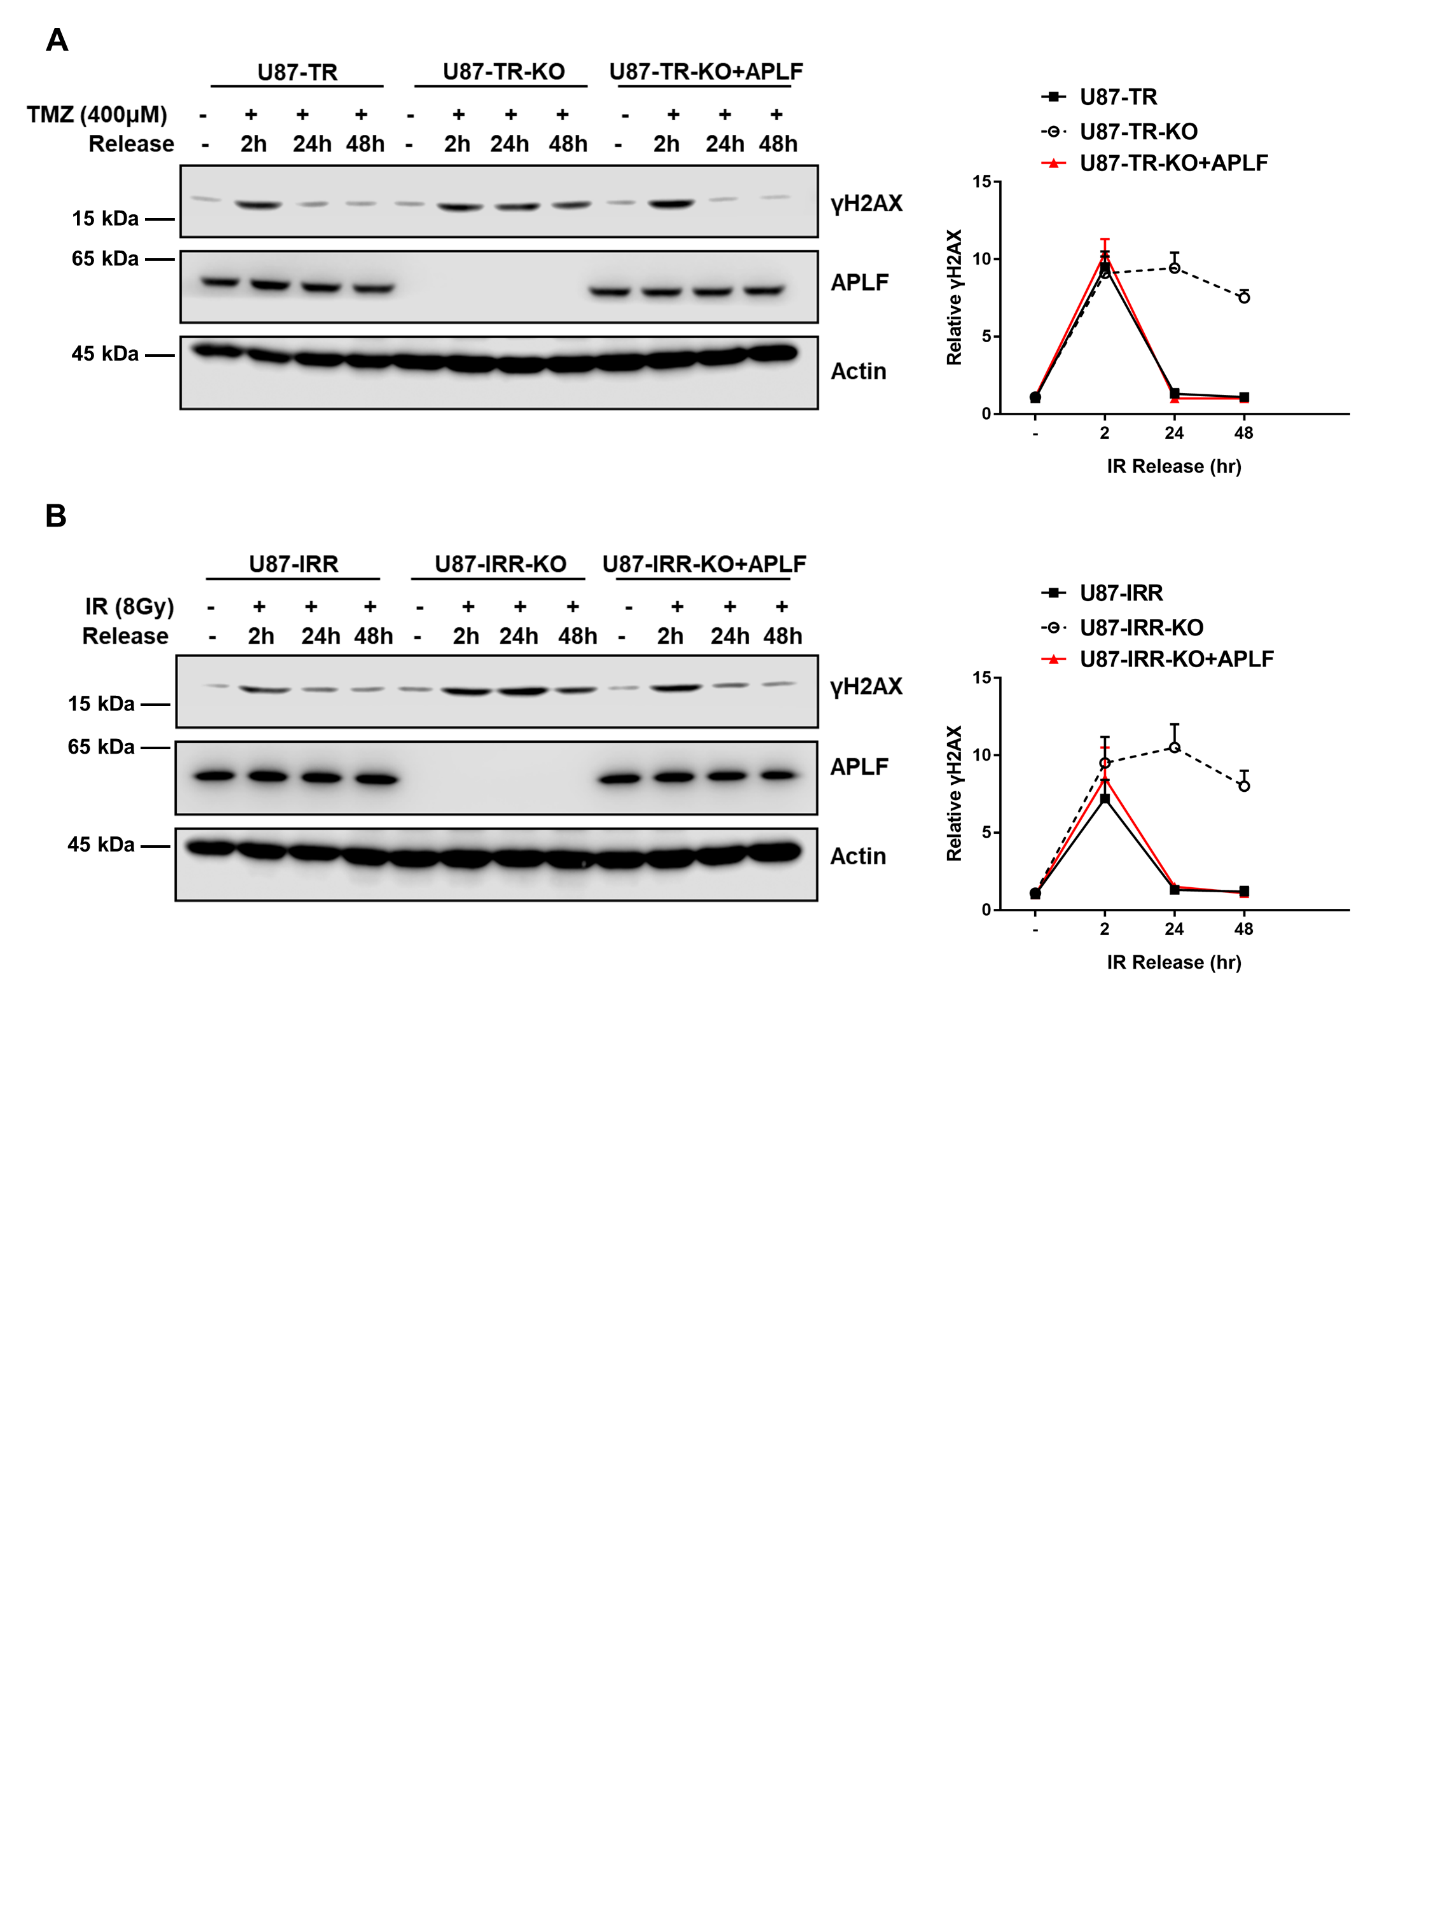


**Supplementary Figure 5. APLF deficiency affects DSB repair dynamics in TMZ- and IR-resistant GBM cells**

**(A)** **Left panel:** Western blot analysis of γH2AX expression in U87-TR, U87-TR-KO and U87-TR-KO+APLF cells after DMSO or TMZ treatment (400 µM). Cells were harvested 2 h, 24 h and 48 h after TMZ treatment. **Right panel:** Quantification of γH2AX expression. Quantified γH2AX levels were normalized to the corresponding intensity of γH2AX in cells without TMZ treatment. **(B)** **Left panel:** Western blot analysis of γH2AX expression in U87-IRR, U87-IRR-KO and U87-IRR-KO+APLF cells after exposure to IR (8 Gy). Cells were harvested 2 h, 24 h and 48 h after IR treatment. **Right panel:** Quantification of γH2AX expression. Quantified γH2AX levels were normalized to the corresponding intensity of γH2AX in cells without IR treatment.


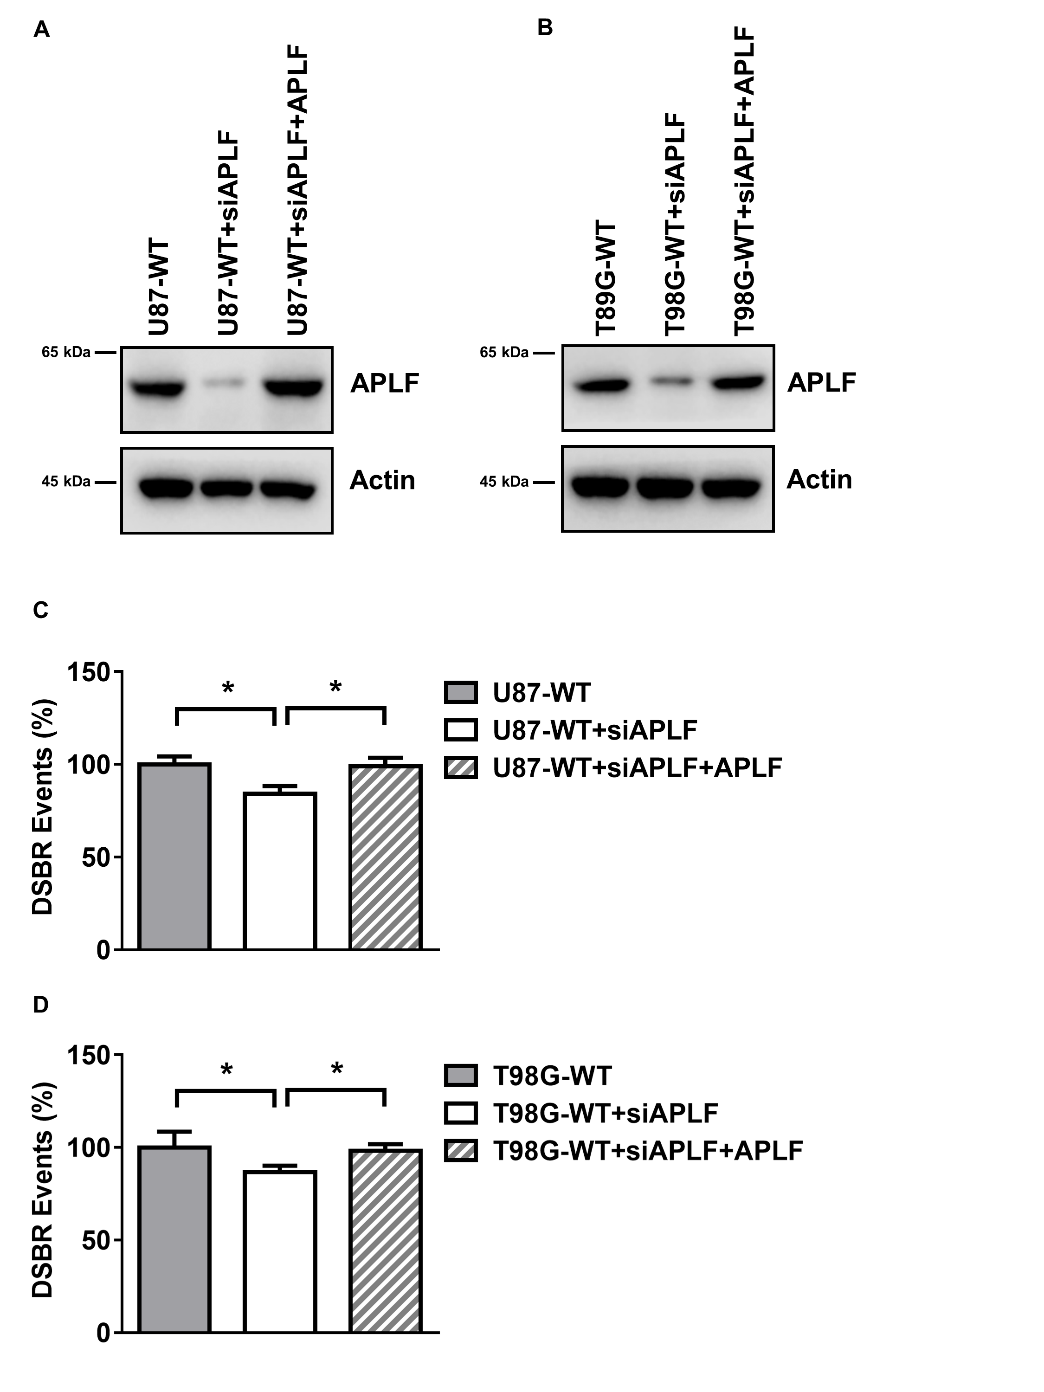


**Supplementary Figure 6. APLF deficiency slightly decreased NHEJ efficiency in WT cells**

**(A)** Western blot analysis of APLF protein expression in U87-WT, APLF knock-down U87-WT (U87-WT+siAPLF) and U87-WT+siAPLF with APLF ectopic expression cells (U87-WT+siAPLF +APLF). **(B)** Western blot analysis of APLF protein expression in T98G- WT, APLF knock-down T98G-WT (T98G-WT+siAPLF) and T98G-WT+siAPLF with APLF ectopic expression cells (T98G-WT+siAPLF+APLF). **(C)** Quantification of GFP cells result from successful NHEJ events in U87-WT, U87-WT+siAPLF, U87-WT+siAPLF +APLF, **(D)** T98G- WT, T98G-WT+siAPLF and T98G-WT+siAPLF+APLF cells. Each result represents 3 independent experiments. *: p<0.05.


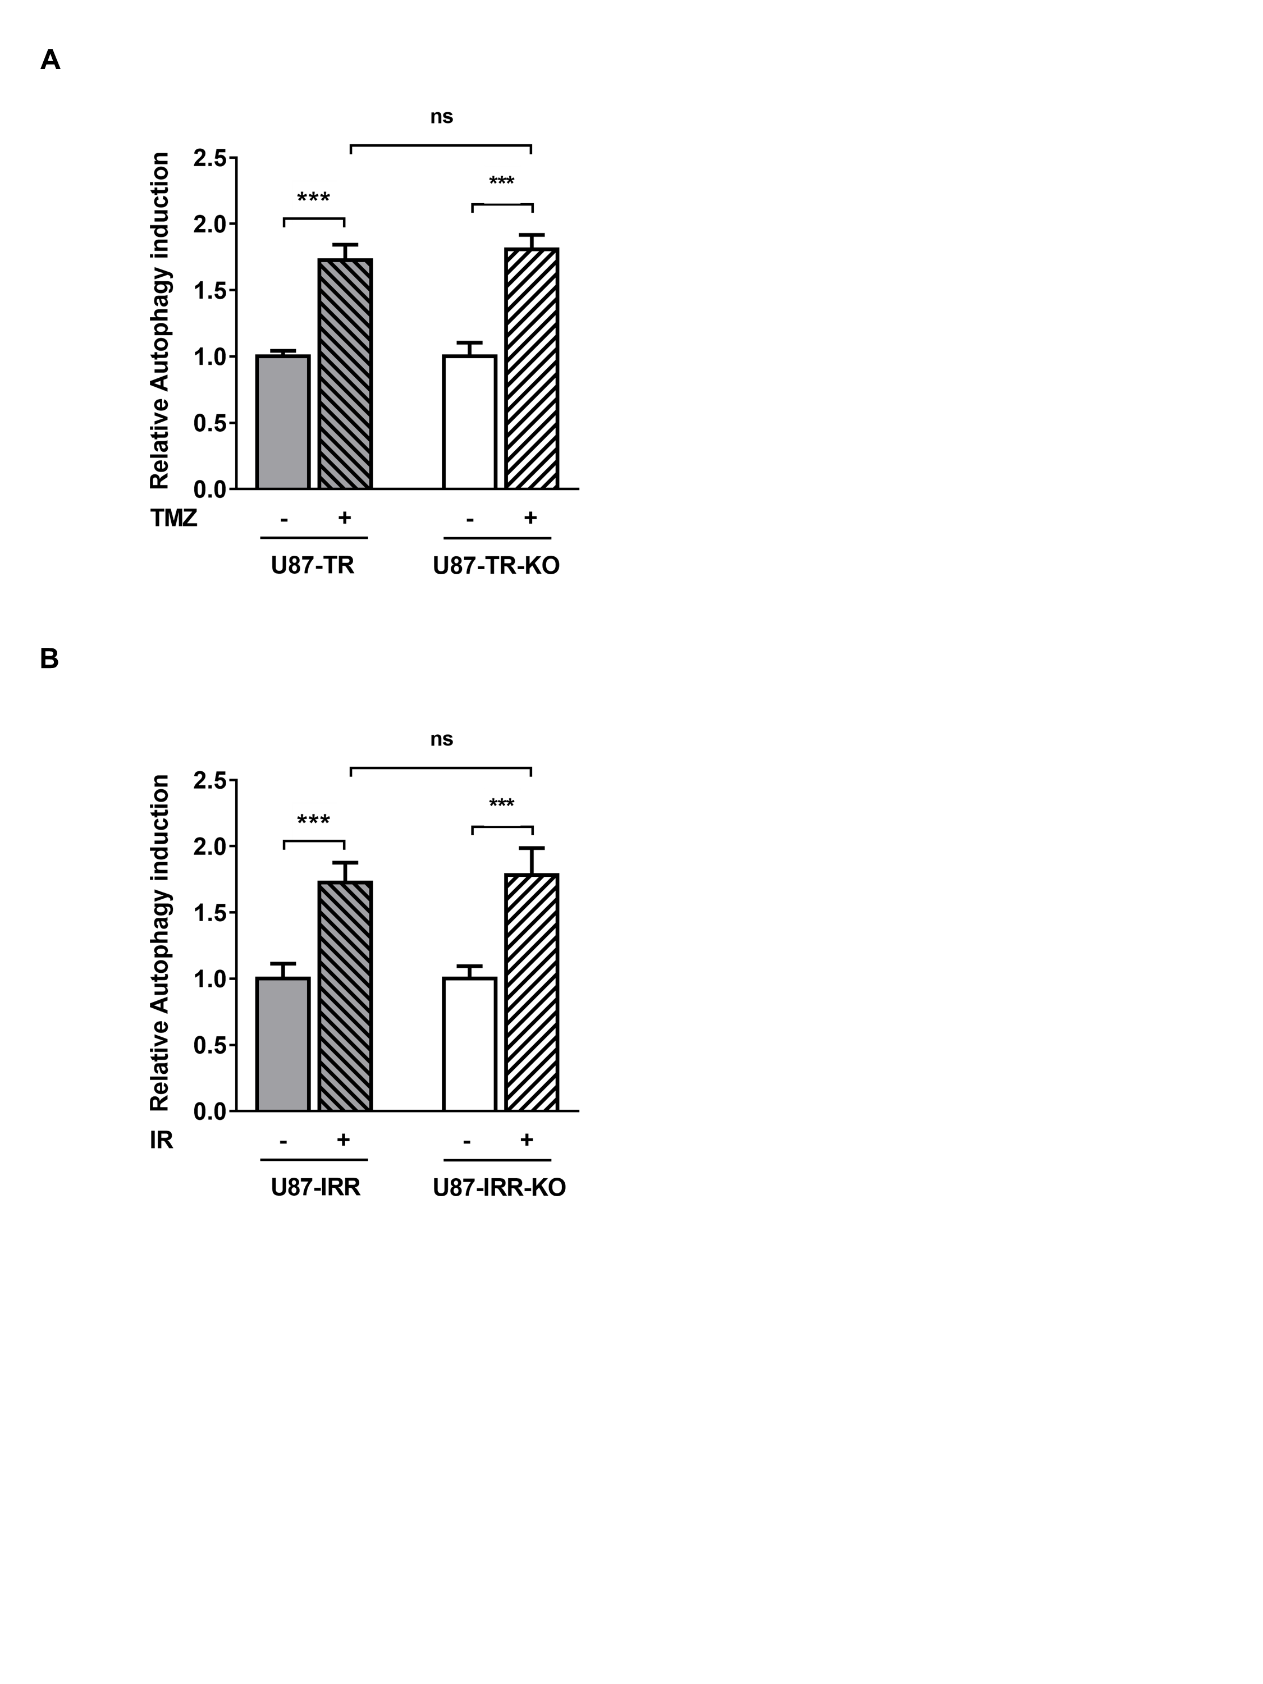


**Supplementary Figure 7. APLF did not contribute to autophagy induced by TMZ or IR in resistant GBM cells.**

**(A)** Relative autophagy activity in U87-TR and U87-TR-KO cells after exposure to TMZ (100 μM). ***: p<0.001, ns: not significant. **(B)** Relative autophagy activity in U87-IRR and U87-IRR-KO cells after exposure to IR (4 Gy). ***: p<0.001, ns: not significant.
